# Supplementary material
Source: PubMed Central journal article supplement (PMC299761)
Supplement: pnas_100_25_14695__9.pdf [file pnas_100_25_14695__9.pdf]

# A model for the regulation of Pol III transcription *in vivo*

## 1. Initiation complex

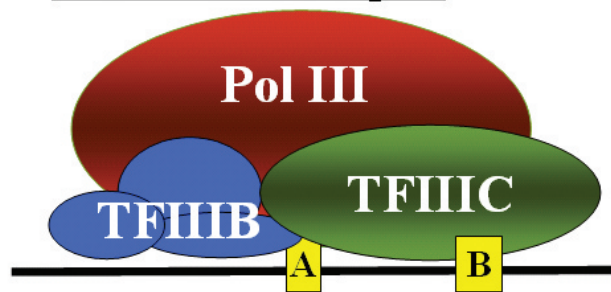

RNA synthesis

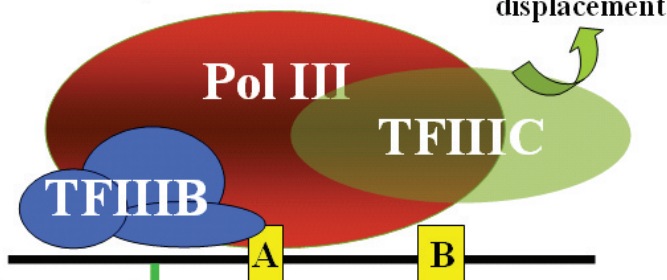

## 2. Reinitiation Pol III/IIIB complex (recycling)

activation

## 3. Preinitiation complex

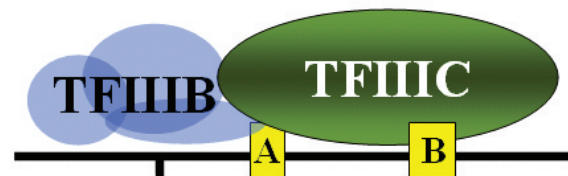

inactive

repression  
(or passive loss)
