# Supplementary material
Source: PubMed Central journal article supplement (PMC299761)

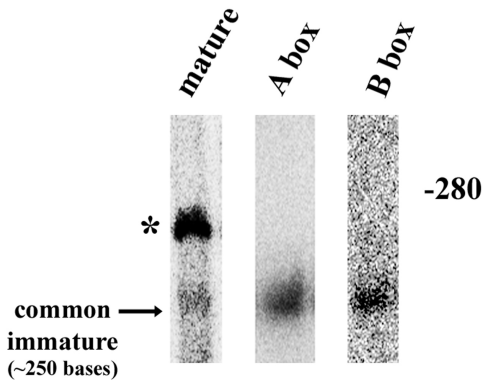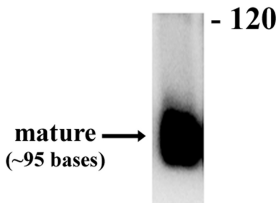

Supplement: pnas_100_25_14695__5.pdf [file pnas_100_25_14695__5.pdf]

**A**

**tRNA<sup>Lys</sup>(CUU)G1**  
**Enrichment at T=0**

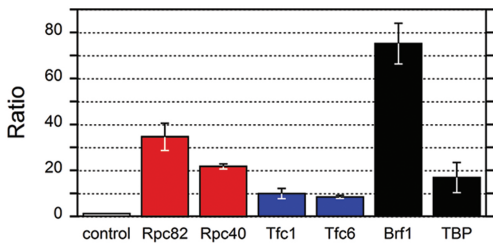**B**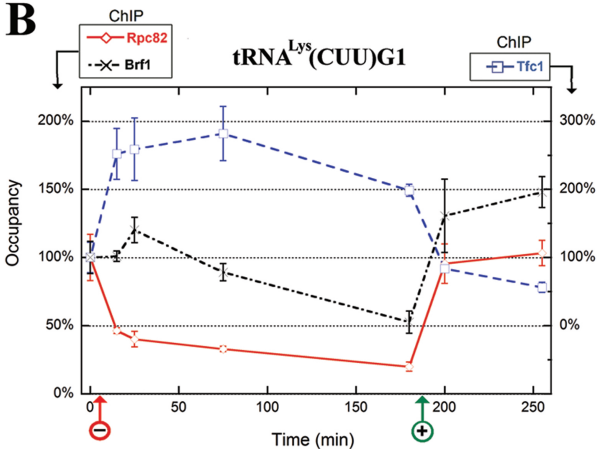**C**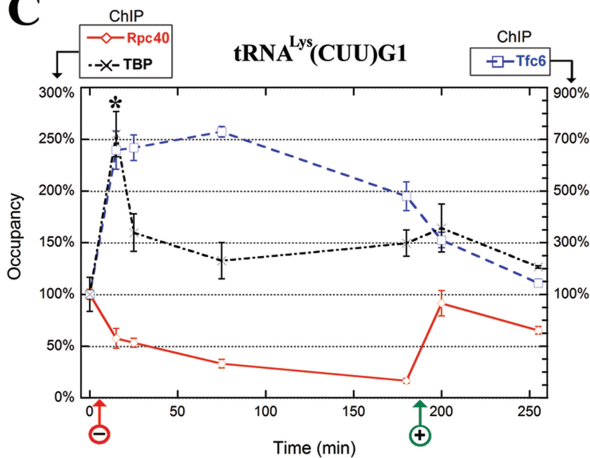

Supplement: pnas_100_25_14695__7.pdf [file pnas_100_25_14695__7.pdf]
